# Supplementary material
Source: PubMed Central journal article supplement (PMC8343380)

# The method utilized to purify the SARS-CoV-2 N protein can affect its molecular properties

Aneta Tarczewska<sup>a+\*</sup>, Marta Kolonko-Adamska<sup>a+\*</sup>, Mirosław Zarębski<sup>b</sup>, Jurek Dobrucki<sup>b</sup>,

Andrzej Ożyhar<sup>a</sup>, Beata Greb-Markiewicz<sup>a\*</sup>

<sup>a</sup>Department of Biochemistry, Molecular Biology and Biotechnology, Faculty of Chemistry, Wrocław University of Science and Technology, Wybrzeże Wyspiańskiego 27, 50-370 Wrocław, Poland

<sup>b</sup>Department of Cell Biophysics, Faculty of Biochemistry, Biophysics and Biotechnology, Jagiellonian University, Gronostajowa 7, 30-387, Cracow, Poland

+First authors

\*Corresponding authors:

E-mail: [aneta.tarczewska@pwr.edu.pl](mailto:aneta.tarczewska@pwr.edu.pl)

[marta.kolonko@pwr.edu.pl](mailto:marta.kolonko@pwr.edu.pl)

[beata.greb-markiewicz@pwr.edu.pl](mailto:beata.greb-markiewicz@pwr.edu.pl)

## Supplementary material

### Figure Legends

Figure S1. The SEC-MALS profile of the N\_p1 sample. The SEC-MALS profile of the N\_p1 sample (magenta line) was superimposed on the SEC-MALS profile of the N\_p2 sample (dashed blue line).

# SEC-MALS

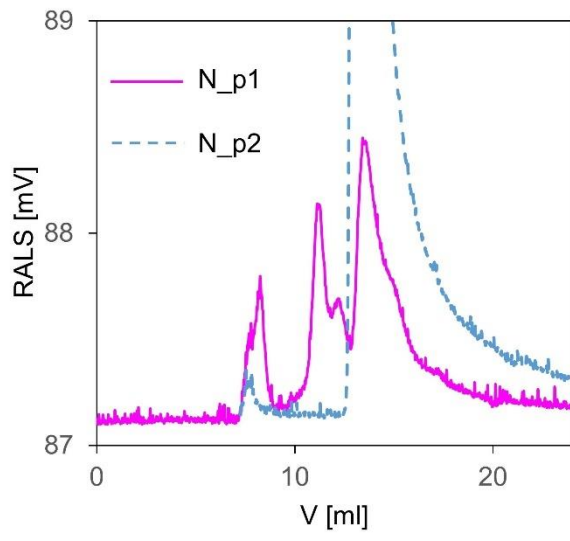

Supplement: mmc1.pdf [file mmc1.pdf]
